# Supplementary material for: Colib’read on galaxy: a tools suite dedicated to biological information extraction from raw NGS reads
Source: PubMed Central journal article supplement (PMC4750246; doi:10.1186/s13742-015-0105-2), 2016-02-11
Supplement: 13742_2015_105_MOESM1_ESM.pdf [file 13742_2015_105_MOESM1_ESM.pdf]

# LoRDEC evaluation: supplementary File - Data and Parameters

Y. Le Bras et al.

To evaluate the efficiency and the impact of the LoRDEC correction at the assembly level, we used public data of two genomes *E. coli* and *S. cerevisiae* (see Table 1). Pacbio reads correction was carried out using LoRDEC (v 0.3) tool using `-k19` and `-s3` and other parameters by default. Then, we ran the ABySS assembler (v 1.3.2) to assemble Pacbio reads using two  $k$ -mer sizes for each genome [1]. Blastn (ncbi-blast-2.2.29+) was used to align the obtained contigs against their reference genome with reward of 1 and a penalty of  $-3$ .

We observed in the absence of PacBio reads correction, the distribution of kmer abundance never exceed 65 while after correction, the same data showed a maximal abundunace value of 250 (see Figure 1). This result attests the efficiently of LoRDEC to correct PacBio reads.

## References

- [1] Jared T. Simpson, Kim Wong, Shaun D. Jackman, Jacqueline E. Schein, Steven J.M. Jones, and Inanç Birol. Abyss: A parallel assembler for short read sequence data. *Genome Research*, 19(6):1117–1123, 2009.

|                            | <i>E. coli</i>          | Yeast                           |
|----------------------------|-------------------------|---------------------------------|
| <b>Reference organism</b>  |                         |                                 |
| Name                       | <i>Escherichia coli</i> | <i>Saccharomyces cerevisiae</i> |
| Strain                     | K-12 substr. MG1655     | W303                            |
| Reference sequence         | NC_000913               | S288C                           |
| Genome size                | 4.6 Mbp                 | 12 Mbp                          |
| <b>PacBio Data</b>         |                         |                                 |
| Accession number           | PacBio reads            | DevNet PacBio                   |
| Number of reads            | 75152                   | 261964                          |
| Avg read length            | 2415                    | 5891                            |
| Max read length            | 19416                   | 30164                           |
| Number of bases            | 181 Mbp                 | 1.5 Gbp                         |
| Coverage                   | 30x                     | 129x                            |
| <b>Illumina Data</b>       |                         |                                 |
| Accession number           | Illumina reads          | SRR567755                       |
| Number of reads (millions) | 11                      | 2.25                            |
| Read length                | 114                     | 100                             |
| Number of bases            | 1.276 Gbp               | 225 Mbp                         |
| Coverage                   | 277x                    | 18x                             |

Table 1: Datasets used to evaluate the efficiency and impact of LoRDEC read correction on the assembly. For the short read data of yeast, we used only half of the available reads. The reference yeast genome is available at this [site](#).

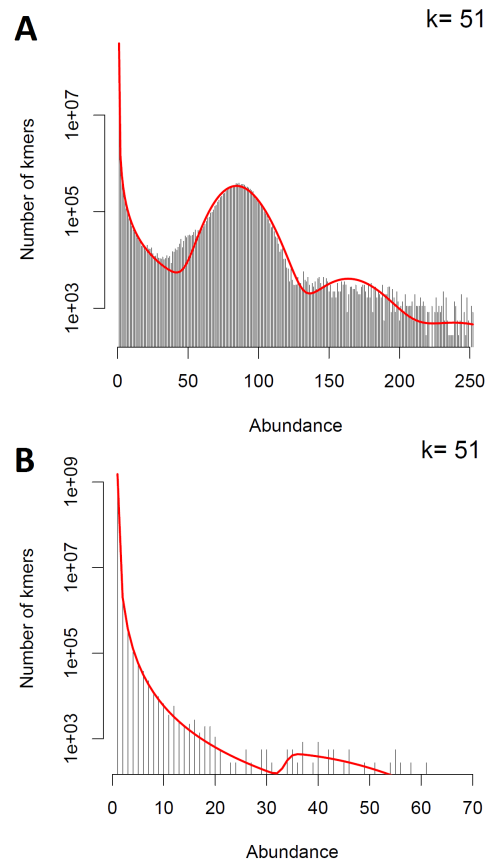

Figure 1: Distribution of the number of distinct  $k$ -mers (y-axis) with respect to their abundance (x-axis) in yeast PacBio reads with (A) and without (B) error correction. Without correction very few  $k$ -mers exceeds an abundance of 20, while after correction there is a peak representing many  $k$ -mers<sup>3</sup> with abundance around 75. The graphics were obtained with K-mer genie.
